# Supplementary material for: Highly efficient 3d/4d–4f coordination polymer catalysts for carbon dioxide fixation into cyclic carbonates
Source: Royal Society of Chemistry journal article supplement (doi:10.1039/c8dt02576b), 2018-01-01
Supplement: c8dt02576b1.pdf [file c8dt02576b1.pdf]

## *Supporting Information*

### **High Efficient 3d / 4d-4f Coordination Polymer Catalyst for Carbon Dioxide Fixation into Cyclic Carbonates**

Gang Wang, Cong Xu, Li Wang, Weisheng Liu\*

*Key Laboratory of Nonferrous Metal Chemistry and Resources Utilization of Gansu Province and State Key Laboratory of Applied Organic Chemistry, Key Laboratory of Special Function Materials and Structure Design, Ministry of Education, College of Chemistry and Chemical Engineering, Lanzhou University, Lanzhou, 730000, China.*

\*Corresponding author. Tel: +86/931/8915151

E/mail: liuws@lzu.edu.cn.

## **Contents**

- 1. Experimental Section.**
- 2. Characterization**
- 3. Supplementary Structural Figures**
- 4. <sup>1</sup>H NMR spectra of the substrates and products.**
- 5 References**

## 1. Experimental section

### 1.1 Synthesis of ligand H<sub>3</sub>L

All reagents were used as purchased without further purification. 5-allyl-2-hydroxy-3-methoxy benzohydrazide was prepared according to the literature method <sup>1</sup>.

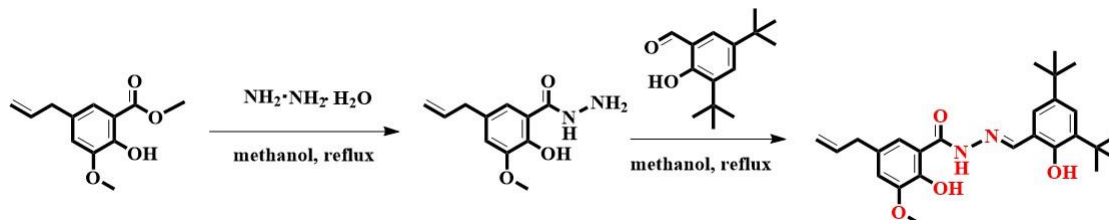

Scheme. S1. Synthesis of ligand H<sub>3</sub>L

*The synthesis of ligand H<sub>3</sub>L:* 5-allyl-2-hydroxy-3-methoxy benzohydrazide (2.22 g, 10 mmol) was added to a solution of 3,5-di-tert-butyl-2-hydroxybenzaldehyde (2.34 g, 10 mmol) in 30 mL methanol. The mixture was stirred at reflux for 6 h at 60°C and then cool to room temperature. The product was separated by filtration and further washing with ethanol to afford H<sub>3</sub>L as a pale yellow green solid (3.6 g, Yield: 82%). <sup>1</sup>H NMR (400 MHz, DMSO-d<sub>6</sub>): δ 8.75 (s, 8H), 8.62 (s, 8H), 7.57 – 7.47 (m, 10H), 6.69 (d, J = 6.7 Hz, 2H), 6.22 (s, 3H), 5.00 – 4.86 (m, 2H), 4.04 (ddt, J = 16.8, 10.1, 6.7 Hz, 1H), 3.02 (d, J = 2.3 Hz, 1H), 2.80 (d, J = 2.4 Hz, 1H), 2.71 (d, J = 2.3 Hz, 1H), 1.43 (s, 1H), -1.33 (s, 1H), -2.06 (s, 1H), -2.14 (s, 1H). IR (KBr,  $\text{cm}^{-1}$ ): 3435 (s), 2960 (s), 1590 (s), 1460 (s), 1369 (s), 1265 (s), 1245 (s), 1210 (s), 1175 (s), 1302 (s), 1067 (w), 995 (w), 920 (m), 875(m), 780(m). ESI-MS m/z [(M+H)<sup>+</sup>]: 439.27.

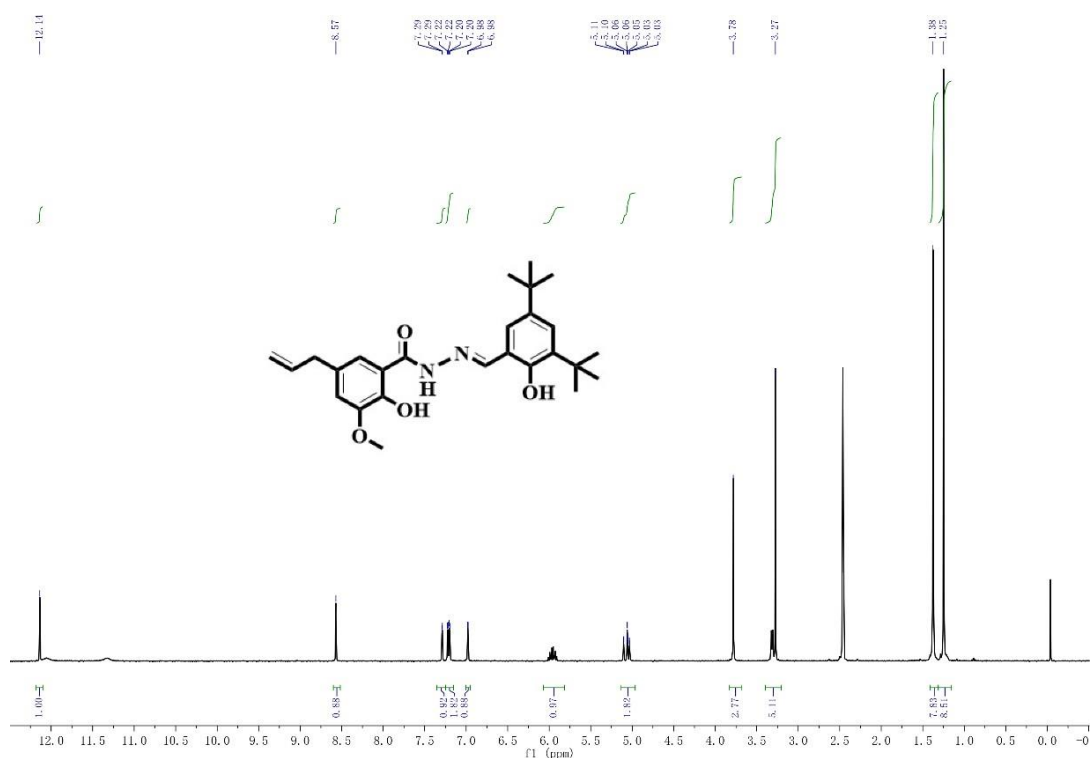

Fig. S1. <sup>1</sup>H-NMR (400 MHz, DMSO-d<sub>6</sub>) spectra of the H<sub>3</sub>L

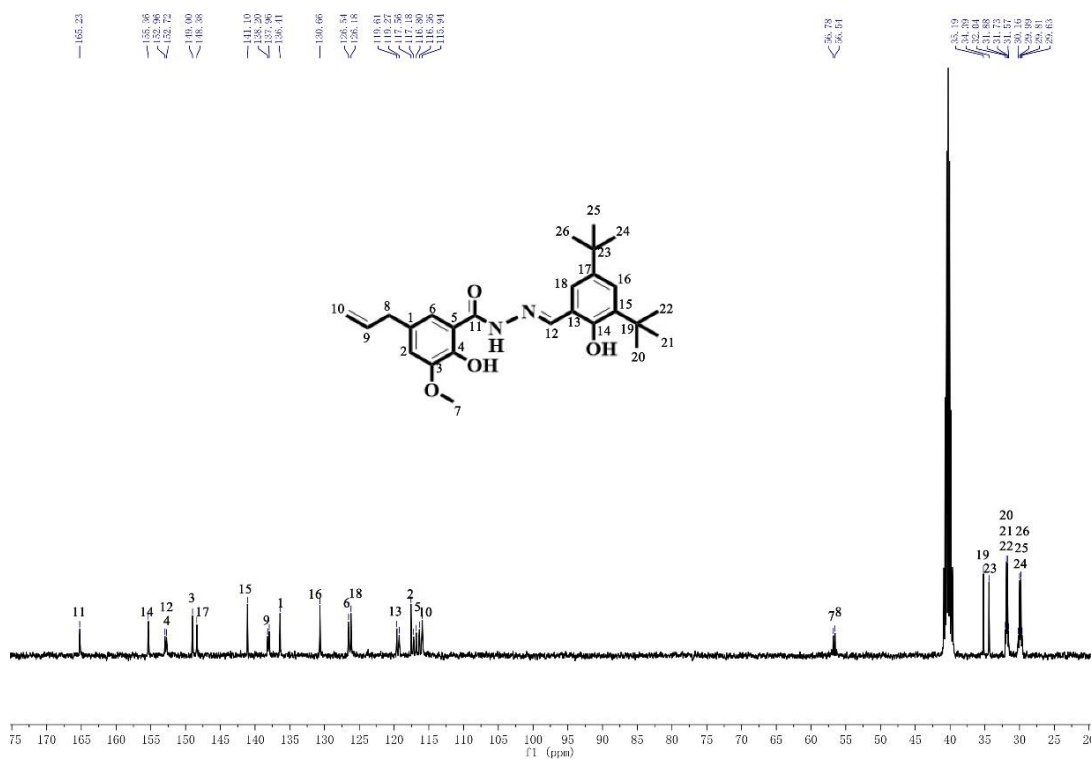

Fig. S2. <sup>13</sup>C-NMR (100 MHz, DMSO-d<sub>6</sub>) spectra of the H<sub>3</sub>L

## Generic Display Report

### Analysis Info

Analysis Name D:\Data\yang\new\WANGGANG171218\_10\_01\_14604.d  
Method POS\_100-1200\_For LC.m  
Sample Name WANGGANG171218  
Comment

Acquisition Date 12/18/2017 3:58:11 PM

Operator LZU  
Instrument micrOTOF

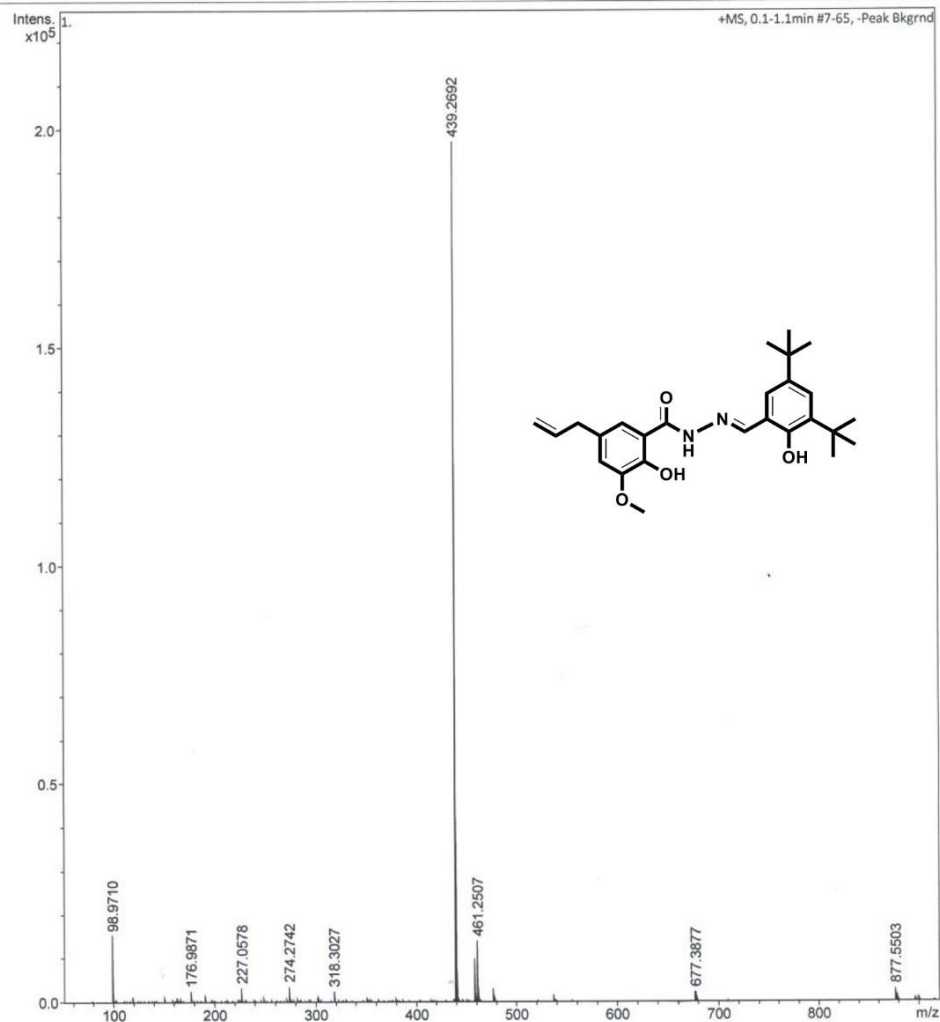

Bruker Compass DataAnalysis 4.1

printed: 12/18/2017 4:15:00 PM

by: LZU

Page 1 of 1

**Fig. S3.** Mass spectrum of the H<sub>3</sub>L

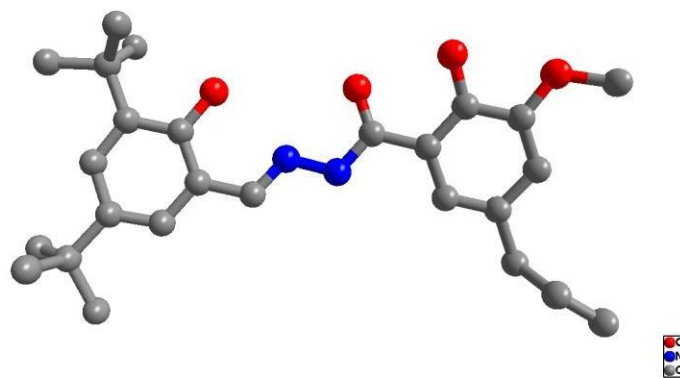

**Fig. S4.** Single crystal structure of H<sub>3</sub>L

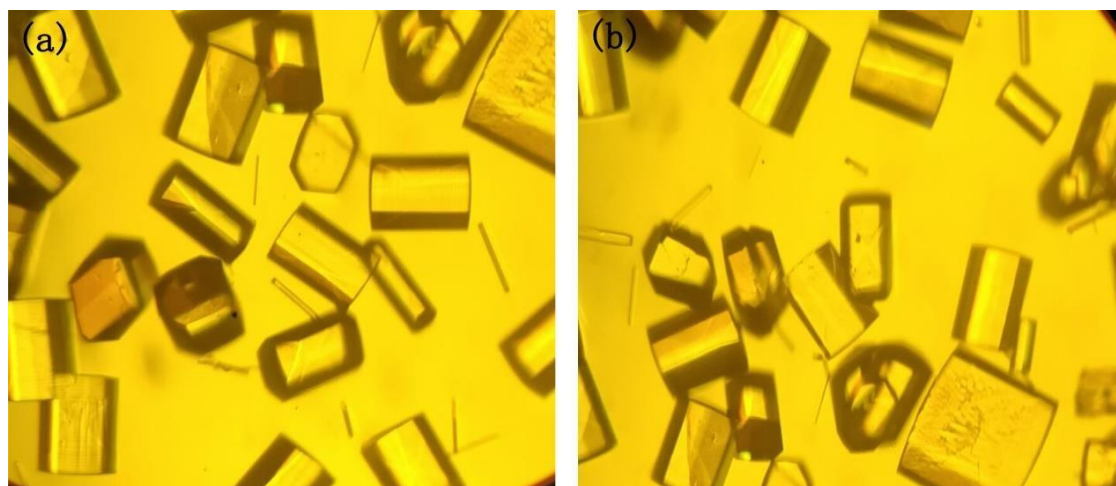

**Fig. S5.** Photographs of as-synthesized crystals of complex 1 (a) and complex2 (b)

### Crystallography

Table S1. Crystal data and structure refinement parameters for complex 1 and 2

|                                        | H <sub>3</sub> L                                              | Complex 1                                                                                        | Complex 2                                                                                        |
|----------------------------------------|---------------------------------------------------------------|--------------------------------------------------------------------------------------------------|--------------------------------------------------------------------------------------------------|
| Empirical Formula                      | C <sub>26</sub> H <sub>34</sub> N <sub>2</sub> O <sub>4</sub> | C <sub>117</sub> H <sub>160</sub> Zn <sub>2</sub> Dy <sub>2</sub> N <sub>9</sub> O <sub>28</sub> | C <sub>113</sub> H <sub>150</sub> Cd <sub>2</sub> Dy <sub>2</sub> N <sub>9</sub> O <sub>25</sub> |
| Formula weight                         | 438.55                                                        | 2596.27                                                                                          | 1765.73                                                                                          |
| Temp (K)                               | 100K                                                          | 100 K                                                                                            | 100 K                                                                                            |
| Crystal system                         | Orthorhombic                                                  | Monoclinic                                                                                       | Monoclinic                                                                                       |
| Space group                            | Pbca                                                          | P 2 <sub>1</sub> /c                                                                              | P 2 <sub>1</sub> /c                                                                              |
| a (Å)                                  | 23.436 (2),                                                   | 19.7435(11)                                                                                      | 19.5629(9)                                                                                       |
| b (Å)                                  | 8.3954 (7),                                                   | 30.6695(7)                                                                                       | 30.9876(7)                                                                                       |
| c (Å)                                  | 25.163 (2)                                                    | 27.5210(15)                                                                                      | 27.6893(14)                                                                                      |
| (deg)                                  | 90                                                            | 90                                                                                               | 90                                                                                               |
| (deg)                                  | 90                                                            | 120.528(3)                                                                                       | 121.014(3)                                                                                       |
| (deg)                                  | 90                                                            | 90                                                                                               | 90                                                                                               |
| V(Å <sup>3</sup> )                     | 4951.1 (8)                                                    | 14354.6(12)                                                                                      | 14385.8(11)                                                                                      |
| Z                                      | 8                                                             | 4                                                                                                | 4                                                                                                |
| D <sub>calc</sub> (Mg/m <sup>3</sup> ) | 1.177                                                         | 1.201                                                                                            | 1.194                                                                                            |
| (mm <sup>-1</sup> )                    | 0.08                                                          | 6.372                                                                                            | 1.380                                                                                            |
| F(000)                                 | 1888                                                          | 5364                                                                                             | 5279                                                                                             |
| Reflections collected                  | 15891                                                         | 18199                                                                                            | 16532                                                                                            |
| No. of parameters                      | 306                                                           | 1463                                                                                             | 1443                                                                                             |
| R <sub>int</sub>                       | 0.070                                                         | 0.079                                                                                            | 0.066                                                                                            |
| R <sub>1</sub> [I > 2σ(I)]             | 0.078                                                         | 0.080                                                                                            | 0.0717                                                                                           |
| wR <sub>2</sub> [I > 2σ(I)]            | 0.1999                                                        | 0.247                                                                                            | 0.1858                                                                                           |

|                                      |                |                |                |
|--------------------------------------|----------------|----------------|----------------|
| Goodness-of-fit<br>on F <sup>2</sup> | 1.04           | 1.02           | 1.03           |
| <b>CCDC number</b>                   | <b>1829444</b> | <b>1815465</b> | <b>1815466</b> |

Table S2. Selected bond lengths (Å) for complex 1 and 2

| <b>Complex1</b>                      |             |                                            |             |
|--------------------------------------|-------------|--------------------------------------------|-------------|
| Dy1—O1                               | 2.218 (4)   | Dy2—O16 <sup>iii</sup>                     | 2.194 (5)   |
| Dy1—O2                               | 2.405 (4)   | Dy2—O25                                    | 2.430 (5)   |
| Dy1—O7 <sup>i</sup>                  | 2.354 (5)   | Dy2—O26                                    | 2.427 (5)   |
| Dy1—O8 <sup>i</sup>                  | 2.188 (5)   | Dy2—N5                                     | 2.509 (5)   |
| Dy1—O21                              | 2.407 (6)   | Dy2—N7 <sup>iii</sup>                      | 2.530 (6)   |
| Dy1—O22                              | 2.401 (6)   | Zn2—O11                                    | 1.972 (5)   |
| Dy1—N1                               | 2.530 (5)   | Zn2—O12                                    | 2.301 (8)   |
| Dy1—N3 <sup>i</sup>                  | 2.529 (6)   | Zn2—O13                                    | 2.380 (7)   |
| Zn1—O3                               | 2.008 (5)   | Zn2—O14                                    | 1.969 (6)   |
| Zn1—O4                               | 2.325 (5)   | Zn2—O19                                    | 1.979 (8)   |
| Zn1—O5                               | 2.448 (6)   | Zn2—O24                                    | 2.123 (9)   |
| Zn1—O6                               | 1.971 (5)   | O15—Dy2 <sup>iv</sup>                      | 2.375 (4)   |
| Zn1—O17                              | 1.991 (6)   | O16—Dy2 <sup>iv</sup>                      | 2.194 (5)   |
| Zn1—O23                              | 2.100 (6)   | N7—Dy2 <sup>iv</sup>                       | 2.530 (6)   |
| O7—Dy1 <sup>ii</sup>                 | 2.354 (5)   | O8—Dy1 <sup>ii</sup>                       | 2.188 (5)   |
| N3—Dy1 <sup>ii</sup>                 | 2.529 (6)   |                                            |             |
| O1—Dy1—O2                            | 134.38 (17) | O9—Dy2—O15 <sup>iii</sup>                  | 80.36 (16)  |
| O1—Dy1—O7 <sup>i</sup>               | 80.02 (18)  | O9—Dy2—O25                                 | 152.09 (16) |
| O1—Dy1—O21                           | 91.5 (2)    | O9—Dy2—O26                                 | 87.95 (19)  |
| O1—Dy1—O22                           | 151.7 (2)   | O9—Dy2—N5                                  | 70.25 (17)  |
| O1—Dy1—N1                            | 69.91 (17)  | O9—Dy2—N7 <sup>iii</sup>                   | 82.24 (17)  |
| O1—Dy1—N3 <sup>i</sup>               | 85.65 (17)  | O10—Dy2—O25                                | 70.77 (16)  |
| O2—Dy1—O21                           | 73.3 (2)    | O10—Dy2—O26                                | 75.09 (19)  |
| O2—Dy1—N1                            | 64.66 (17)  | O10—Dy2—N5                                 | 64.56 (17)  |
| O2—Dy1—N3 <sup>i</sup>               | 134.49 (17) | O10—Dy2—N7 <sup>iii</sup>                  | 137.01 (17) |
| O7 <sup>i</sup> —Dy1—O2              | 131.31 (17) | O15 <sup>iii</sup> —Dy2—O10                | 131.36 (17) |
| O7 <sup>i</sup> —Dy1—O21             | 72.57 (19)  | O15 <sup>iii</sup> —Dy2—O25                | 72.14 (16)  |
| O7 <sup>i</sup> —Dy1—O22             | 72.2 (2)    | O15 <sup>iii</sup> —Dy2—O26                | 73.85 (18)  |
| O7 <sup>i</sup> —Dy1—N1              | 134.64 (18) | O15 <sup>iii</sup> —Dy2—N5                 | 136.43 (18) |
| O7 <sup>i</sup> —Dy1—N3 <sup>i</sup> | 64.33 (19)  | O15 <sup>iii</sup> —Dy2—N7 <sup>iii</sup>  | 64.23 (18)  |
| O8 <sup>i</sup> —Dy1—O1              | 99.22 (18)  | O16 <sup>iii</sup> —Dy2—O9                 | 99.74 (17)  |
| O8 <sup>i</sup> —Dy1—O2              | 81.20 (17)  | O16 <sup>iii</sup> —Dy2—O10                | 80.63 (17)  |
| O8 <sup>i</sup> —Dy1—O7 <sup>i</sup> | 134.04 (17) | O16 <sup>iii</sup> —Dy2—O15 <sup>iii</sup> | 133.69 (17) |
| O8 <sup>i</sup> —Dy1—O21             | 152.54 (19) | O16 <sup>iii</sup> —Dy2—O25                | 95.90 (17)  |
| O8 <sup>i</sup> —Dy1—O22             | 96.4 (3)    | O16 <sup>iii</sup> —Dy2—O26                | 152.14 (18) |
| O8 <sup>i</sup> —Dy1—N1              | 84.97 (17)  | O16 <sup>iii</sup> —Dy2—N5                 | 83.75 (19)  |
| O8 <sup>i</sup> —Dy1—N3 <sup>i</sup> | 69.78 (18)  | O16 <sup>iii</sup> —Dy2—N7 <sup>iii</sup>  | 69.88 (17)  |
| O21—Dy1—N1                           | 75.1 (2)    | O25—Dy2—N5                                 | 134.79 (17) |

|                         |             |                           |             |
|-------------------------|-------------|---------------------------|-------------|
| O21—Dy1—N3 <sup>i</sup> | 136.7 (2)   | O25—Dy2—N7 <sup>iii</sup> | 81.66 (17)  |
| O22—Dy1—O2              | 71.4 (2)    | O26—Dy2—O25               | 88.9 (2)    |
| O22—Dy1—O21             | 85.3 (3)    | O26—Dy2—N5                | 73.7 (2)    |
| O22—Dy1—N1              | 135.3 (2)   | O26—Dy2—N7 <sup>iii</sup> | 137.95 (18) |
| O22—Dy1—N3 <sup>i</sup> | 77.7 (2)    | N5—Dy2—N7 <sup>iii</sup>  | 137.90 (19) |
| N3 <sup>i</sup> —Dy1—N1 | 141.59 (19) | O11—Zn2—O12               | 74.7 (2)    |
| O3—Zn1—O4               | 72.74 (19)  | O11—Zn2—O13               | 86.1 (3)    |
| O3—Zn1—O5               | 83.0 (2)    | O11—Zn2—O19               | 98.2 (3)    |
| O3—Zn1—O23              | 93.0 (2)    | O11—Zn2—O24               | 89.5 (3)    |
| O4—Zn1—O5               | 83.2 (2)    | O12—Zn2—O13               | 80.9 (3)    |
| O6—Zn1—O3               | 149.5 (2)   | O14—Zn2—O11               | 157.0 (3)   |
| O6—Zn1—O4               | 87.6 (2)    | O14—Zn2—O12               | 93.4 (3)    |
| O6—Zn1—O5               | 71.5 (2)    | O14—Zn2—O13               | 72.5 (2)    |
| O6—Zn1—O17              | 108.1 (2)   | O14—Zn2—O19               | 103.9 (3)   |
| O6—Zn1—O23              | 99.3 (3)    | O14—Zn2—O24               | 97.0 (3)    |
| O17—Zn1—O3              | 98.2 (3)    | O19—Zn2—O12               | 105.3 (4)   |
| O17—Zn1—O4              | 99.4 (2)    | O19—Zn2—O13               | 173.2 (3)   |
| O17—Zn1—O5              | 177.3 (2)   | O19—Zn2—O24               | 88.6 (4)    |
| O17—Zn1—O23             | 95.9 (2)    | O24—Zn2—O12               | 160.2 (3)   |
| O23—Zn1—O4              | 160.3 (2)   | O24—Zn2—O13               | 86.2 (3)    |
| O23—Zn1—O5              | 81.6 (2)    |                           |             |

Symmetry codes: (i)  $-x-1, y+1/2, -z-3/2$ ; (ii)  $-x-1, y-1/2, -z-3/2$ ; (iii)  $-x, y-1/2, -z-3/2$ ; (iv)  $-x, y+1/2, -z-3/2$ .

| Complex2              |            |                         |            |
|-----------------------|------------|-------------------------|------------|
| Dy2—O17               | 2.187 (4)  | Dy1—O5                  | 2.194 (5)  |
| Dy2—O13               | 2.202 (5)  | Dy1—O6                  | 2.406 (5)  |
| Dy2—O14               | 2.382 (4)  | Dy1—O10                 | 2.416 (5)  |
| Dy2—O18               | 2.399 (4)  | Dy1—O2                  | 2.392 (5)  |
| Dy2—O22               | 2.403 (5)  | Dy1—O9                  | 2.431 (6)  |
| Dy2—O21               | 2.415 (6)  | Dy1—N1                  | 2.516 (6)  |
| Dy2—N5                | 2.519 (6)  | Dy1—N3                  | 2.508 (6)  |
| Dy2—N7                | 2.528 (5)  | Cd1A—O8                 | 2.424 (8)  |
| Cd2—O15               | 2.169 (5)  | Cd1A—O7                 | 2.092 (7)  |
| Cd2—O20 <sup>i</sup>  | 2.480 (5)  | Cd1A—O11                | 2.360 (11) |
| Cd2—O19 <sup>i</sup>  | 2.204 (4)  | Cd1A—O12                | 2.141 (12) |
| Cd2—O16               | 2.547 (5)  | Cd1A—C55                | 2.49 (2)   |
| Cd2—O23               | 2.529 (6)  | Cd1A—Cd1B               | 0.881 (8)  |
| Cd2—O25               | 2.341 (6)  | O3—Cd1B <sup>iii</sup>  | 1.950 (6)  |
| Cd2—O24               | 2.272 (6)  | O7—Cd1B                 | 2.396 (9)  |
| Cd2—C110              | 2.748 (11) | O4—Cd1B <sup>iii</sup>  | 2.047 (11) |
| O20—Cd2 <sup>ii</sup> | 2.480 (5)  | O12—Cd1B                | 2.602 (15) |
| O19—Cd2 <sup>ii</sup> | 2.204 (4)  | C10—Cd1B <sup>iii</sup> | 2.671 (11) |
| O19—C92               | 1.315 (8)  | Cd1B—O3 <sup>iv</sup>   | 1.950 (6)  |

|                                        |             |                       |             |
|----------------------------------------|-------------|-----------------------|-------------|
| Dy1—O1                                 | 2.189 (5)   | Cd1B—O4 <sup>iv</sup> | 2.047 (11)  |
| Cd1B—C10 <sup>iv</sup>                 | 2.671 (11)  |                       |             |
| O17—Dy2—O13                            | 98.64 (17)  | O1—Dy1—O6             | 79.88 (17)  |
| O17—Dy2—O14                            | 79.50 (16)  | O1—Dy1—O10            | 97.14 (16)  |
| O17—Dy2—O18                            | 134.99 (16) | O1—Dy1—O2             | 134.75 (17) |
| O17—Dy2—O22                            | 90.61 (19)  | O1—Dy1—O9             | 151.42 (17) |
| O17—Dy2—O21                            | 152.46 (19) | O1—Dy1—N1             | 70.14 (17)  |
| O17—Dy2—N5                             | 84.26 (16)  | O1—Dy1—N3             | 83.12 (17)  |
| O17—Dy2—N7                             | 70.33 (17)  | O5—Dy1—O6             | 135.41 (16) |
| O13—Dy2—O14                            | 134.57 (15) | O5—Dy1—O10            | 151.10 (16) |
| O13—Dy2—O18                            | 80.58 (17)  | O5—Dy1—O2             | 79.80 (16)  |
| O13—Dy2—O22                            | 152.72 (17) | O5—Dy1—O9             | 91.1 (2)    |
| O13—Dy2—O21                            | 96.8 (2)    | O5—Dy1—N1             | 81.19 (17)  |
| O13—Dy2—N5                             | 69.97 (17)  | O5—Dy1—N3             | 70.69 (18)  |
| O13—Dy2—N7                             | 83.80 (17)  | O6—Dy1—O10            | 71.75 (16)  |
| O14—Dy2—O18                            | 131.88 (17) | O6—Dy1—O9             | 74.83 (18)  |
| O14—Dy2—O22                            | 72.26 (16)  | O6—Dy1—N1             | 136.12 (17) |
| O14—Dy2—O21                            | 73.4 (2)    | O6—Dy1—N3             | 64.80 (18)  |
| O14—Dy2—N5                             | 64.66 (17)  | O10—Dy1—O9            | 87.5 (2)    |
| O14—Dy2—N7                             | 134.84 (17) | O10—Dy1—N1            | 80.82 (18)  |
| O18—Dy2—O22                            | 74.85 (18)  | O10—Dy1—N3            | 135.82 (19) |
| O18—Dy2—O21                            | 70.13 (18)  | O2—Dy1—O6             | 132.30 (18) |
| O18—Dy2—N5                             | 134.66 (16) | O2—Dy1—O10            | 72.12 (16)  |
| O18—Dy2—N7                             | 64.83 (18)  | O2—Dy1—O9             | 73.50 (19)  |
| O22—Dy2—O21                            | 86.0 (3)    | O2—Dy1—N1             | 64.81 (19)  |
| O22—Dy2—N5                             | 136.85 (18) | O2—Dy1—N3             | 135.30 (18) |
| O22—Dy2—N7                             | 75.21 (18)  | O9—Dy1—N1             | 138.3 (2)   |
| O21—Dy2—N5                             | 79.8 (2)    | O9—Dy1—N3             | 74.3 (2)    |
| O21—Dy2—N7                             | 134.23 (19) | N3—Dy1—N1             | 138.0 (2)   |
| N5—Dy2—N7                              | 140.22 (18) | O8—Cd1A—C55           | 113.6 (5)   |
| O15—Cd2—O20 <sup>i</sup>               | 88.73 (18)  | O7—Cd1A—O8            | 69.9 (3)    |
| O15—Cd2—O19 <sup>i</sup>               | 145.71 (19) | O7—Cd1A—O11           | 117.3 (4)   |
| O15—Cd2—O16                            | 67.03 (16)  | O7—Cd1A—O12           | 105.1 (4)   |
| O15—Cd2—O23                            | 83.9 (2)    | O7—Cd1A—C55           | 114.1 (6)   |
| O15—Cd2—O25                            | 101.6 (2)   | O11—Cd1A—O8           | 86.6 (4)    |
| O15—Cd2—O24                            | 119.1 (2)   | O11—Cd1A—C55          | 29.6 (4)    |
| O15—Cd2—C110                           | 103.3 (3)   | O12—Cd1A—O8           | 138.5 (5)   |
| O20 <sup>i</sup> —Cd2—O16              | 77.26 (17)  | O12—Cd1A—O11          | 58.3 (4)    |
| O20 <sup>i</sup> —Cd2—O23              | 75.75 (18)  | O12—Cd1A—C55          | 28.7 (4)    |
| O20 <sup>i</sup> —Cd2—C110             | 95.7 (3)    | Cd1B—Cd1A—O8          | 109.5 (3)   |
| O19 <sup>i</sup> —Cd2—O20 <sup>i</sup> | 67.42 (16)  | Cd1B—Cd1A—O7          | 99.2 (3)    |
| O19 <sup>i</sup> —Cd2—O16              | 83.33 (17)  | Cd1B—Cd1A—O11         | 143.5 (4)   |
| O19 <sup>i</sup> —Cd2—O23              | 111.7 (2)   | Cd1B—Cd1A—O12         | 111.9 (5)   |
| O19 <sup>i</sup> —Cd2—O25              | 87.4 (2)    | Cd1B—Cd1A—C55         | 132.2 (6)   |



|                            |             |                          |           |
|----------------------------|-------------|--------------------------|-----------|
| O19 <sup>i</sup> —Cd2—O24  | 94.0 (2)    | O25—Cd2—O23              | 137.4 (2) |
| O19 <sup>i</sup> —Cd2—C110 | 103.3 (3)   | O25—Cd2—C110             | 113.2 (3) |
| O16—Cd2—C110               | 167.8 (3)   | O24—Cd2—O20 <sup>i</sup> | 116.0 (2) |
| O23—Cd2—O16                | 140.37 (19) | O24—Cd2—O16              | 164.3 (2) |
| O23—Cd2—C110               | 27.6 (3)    | O24—Cd2—O23              | 54.7 (2)  |
| O25—Cd2—O20 <sup>i</sup>   | 145.67 (19) | O24—Cd2—O25              | 87.5 (3)  |
| O25—Cd2—O16                | 77.0 (2)    | O24—Cd2—C110             | 27.2 (3)  |

Symmetry codes: (i)  $-x, y-1/2, -z+3/2$ ; (ii)  $-x, y+1/2, -z+3/2$ ; (iii)  $-x+1, y+1/2, -z+3/2$ ; (iv)  $-x+1, y-1/2, -z+3/2$ .

## 2.Characterization

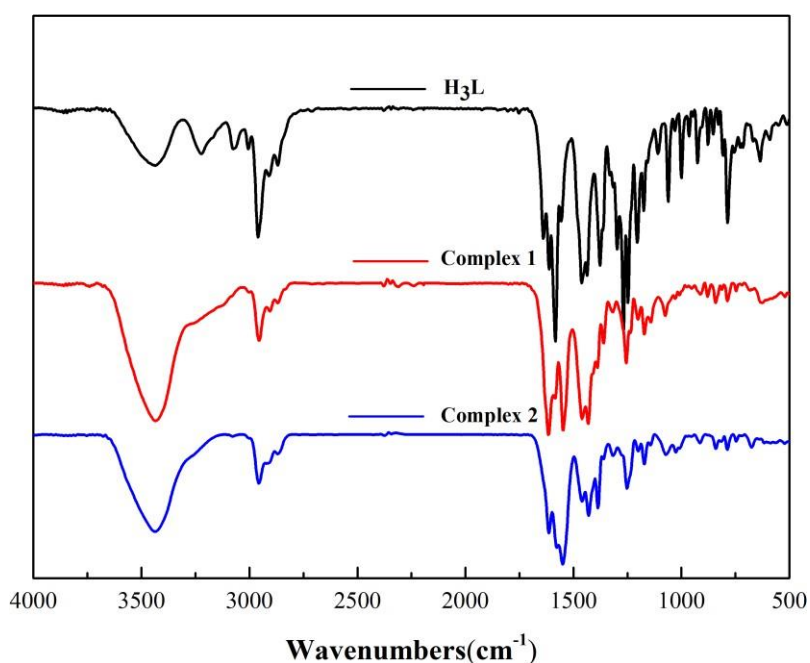

**Fig. S6.** FT-IR spectra of H<sub>3</sub>L, complex 1 and 2

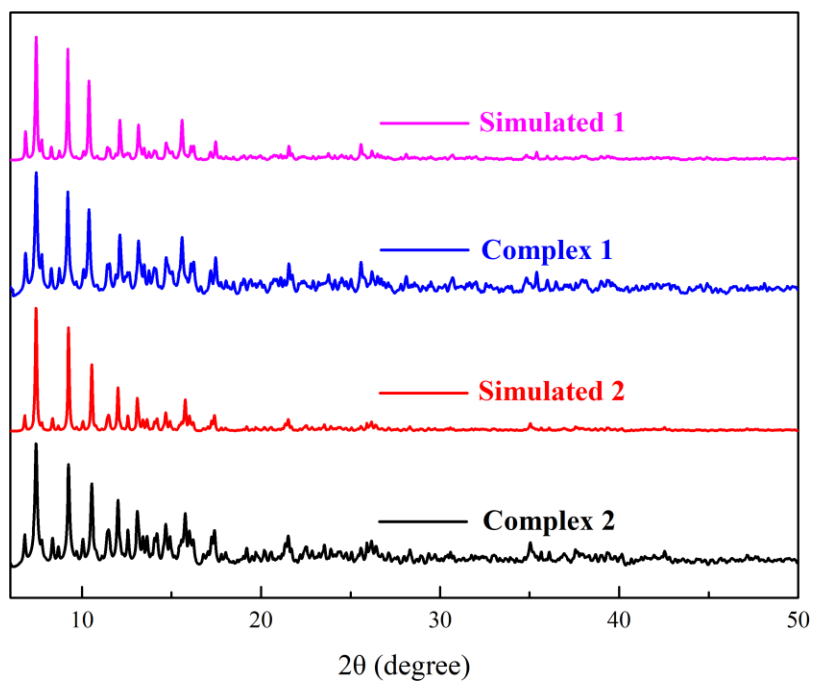

**Fig. S7.** Comparing the simulated PXRD with experimental patterns of complexes 1-2.

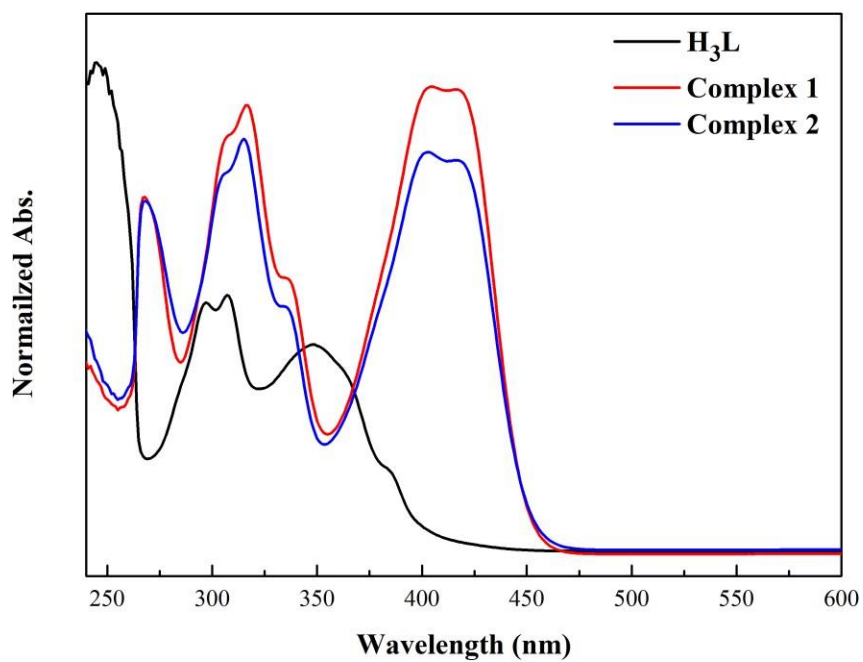

**Fig. S8.** UV/Vis absorption spectra of  $H_3L$ , and complexes 1-2 in DMF solution at room temperature.

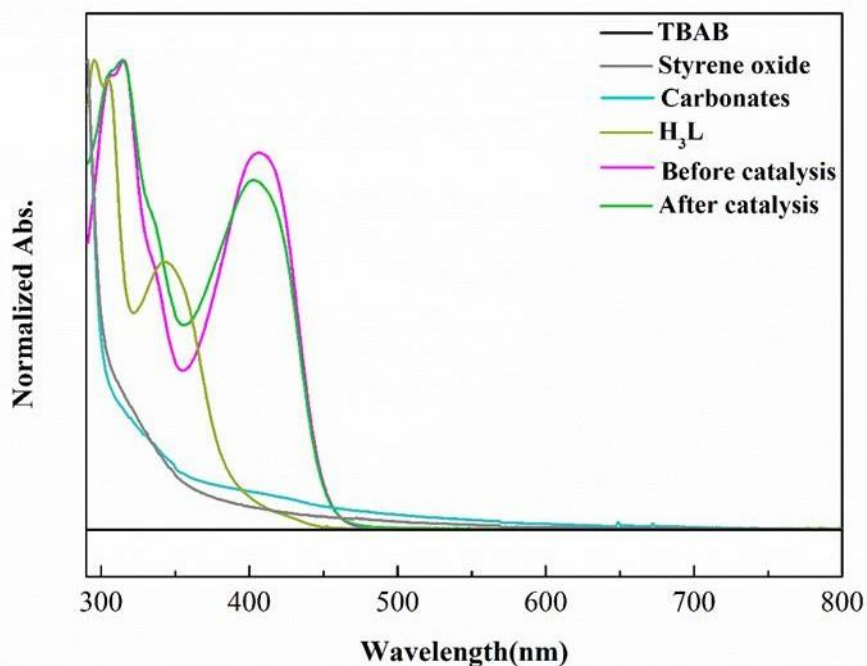

**Fig. S9.** UV/Vis absorption spectra of TBAB, free styrene oxide, free carbonates, H<sub>3</sub>L, before catalysis, and after catalysis, in MeOH solution at room temperature.

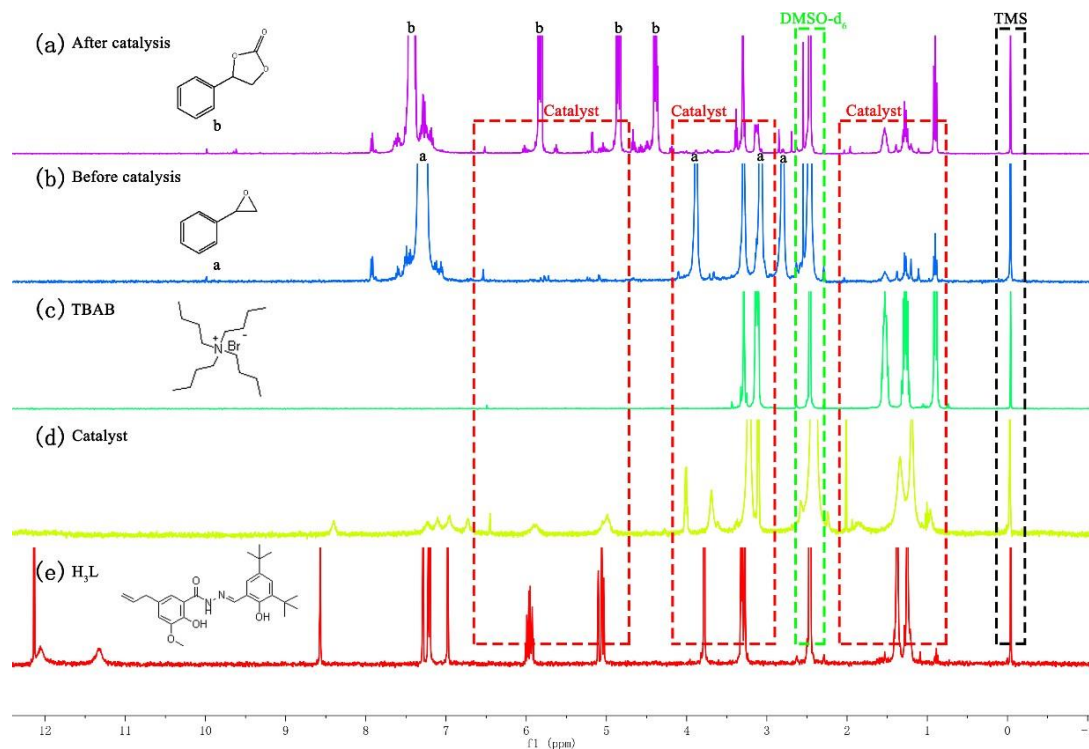

**Fig. S10.** <sup>1</sup>H-NMR spectra of after catalysis (a) before catalysis (b) TBAb (c) catalyst1 (d) and (e) H<sub>3</sub>L dissolved in DMSO-*d*<sub>6</sub>.

### 3. Supplementary Structural Figures

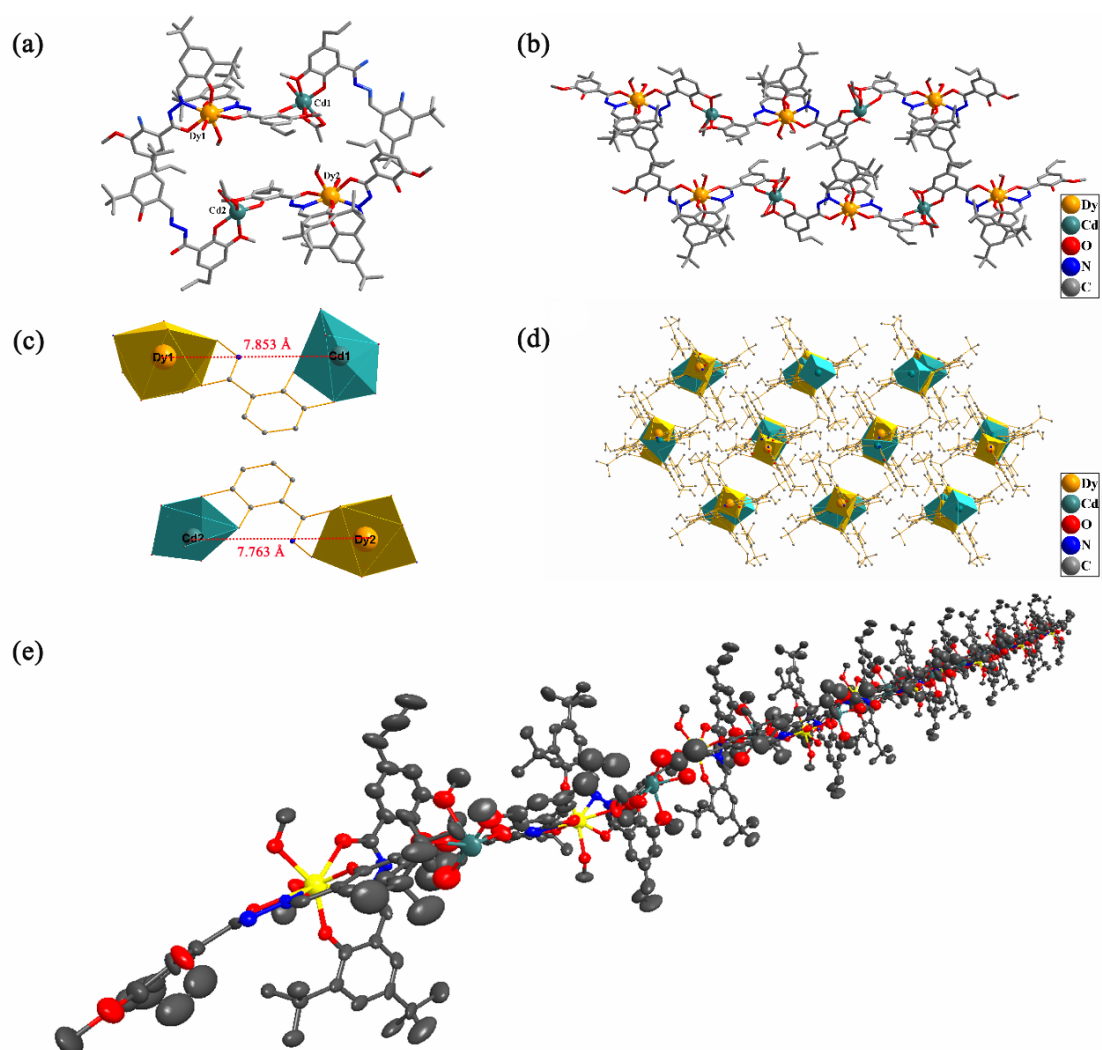

**Fig. S11.** Structural fragments of complex2. (a) The coordination environment of two adjacent Dy1, Dy2, and Cd1, Cd2 centers. (b) 1D double-chain structure. (c) Dy1, Dy2 and Zn1, Zn2 centers coordination polyhedra. (d) Packing diagram along the axis showing three adjacent 1D double chains. (e) Single chain thermo-ellipsoid model diagram

**Table S3.** Comparison of cycloaddition reaction of CO<sub>2</sub> with epoxides catalysed by different catalysts.

| Cat.(%)                                                                                      | Cocat.(%)     | Catalyst/Epoxide<br>(Mole ratio) | P<br>(MPa) | T<br>(°C) | Time<br>(h) | Yields<br>(%) | TOF<br>(h <sup>-1</sup> ) | Ref. |
|----------------------------------------------------------------------------------------------|---------------|----------------------------------|------------|-----------|-------------|---------------|---------------------------|------|
| [EMIm] <sub>2</sub> [Br <sub>2</sub> Zn<br>(Et <sub>2</sub> PO <sub>4</sub> ) <sub>2</sub> ] | —             | (propylene<br>epoxide)<br>1:3000 | 3.5        | 120       | 1           | 99            | 2362                      | 2    |
| [L <sub>1</sub> Zn <sub>2</sub> ] <sub>4</sub>                                               | TBAI<br>(2.5) | (propylene oxide)<br>1:40        | 1          | 45        | 68          | 87            | —                         | 3    |
| Zn(OPO) <sub>2</sub>                                                                         | TBAB<br>(0.9) | (propyleneepoxide)<br>1:40000    | 3          | 120       | 1           | 46            | 18400                     | 4    |

|                                                                                  |                |                                  |     |     |     |    |       |              |
|----------------------------------------------------------------------------------|----------------|----------------------------------|-----|-----|-----|----|-------|--------------|
| <b>Ni(PPh<sub>3</sub>)Cl<sub>2</sub>/PPh<sub>3</sub>/<br/>Zn</b>                 | TBAB           | (propylene<br>epoxide)<br>1:3570 | 2.5 | 120 | 1   | 99 | 3544  | 5            |
| <b>ZnBr<sub>2</sub></b>                                                          | E              | (propyleneepoxide)<br>1:1790     | 3   | 140 | 1   | 81 | 8670  | 6            |
| <b>Zn-CMP</b>                                                                    | TBAB<br>(0.9)  | (propyleneepoxide)<br>1:40000    | 3   | 120 | 1   | 29 | 11600 | 7            |
| <b>Mg-porphyrin</b>                                                              | —              | (1,2-Epoxyhexane)<br>1:33333     | 1.7 | 120 | 1   | 36 | 12000 | 8            |
| <b>Yb-DDPY</b>                                                                   | TBAB<br>(0.5)  | (styrene oxide)<br>1:400         | 1   | 60  | 12  | 52 | 17    | 9            |
| <b>Ionic Rare Earth<br/>Metal</b>                                                | —              | (styrene oxide)<br>1:500         | 0.1 | 90  | 12  | 93 | 38    | 10           |
| <b>Al-<br/>aminotriphenolae</b>                                                  | PPN-Br         | (1,2-Epoxyhexane)<br>1:200000    | 1   | 90  | 2   | 36 | 36000 | 11           |
| <b>Yb-mesocate</b>                                                               | TBAB<br>(0.75) | (styrene oxide)<br>1:1000        | 1   | 120 | 2.5 | 95 | 380   | 12           |
| <b>Helicate-1(Zn-Tb)</b>                                                         | TBAB<br>(0.5)  | (styrene oxide)<br>1:40000       | 1   | 120 | 1   | 67 | 26800 | 13           |
| <b>[Yb(μ-L)(μ<sub>3</sub>-<br/>L)(H<sub>2</sub>O)]<sub>n</sub>Br<sub>n</sub></b> | TBAB<br>(3.0)  | (Epichlorohydrin)<br>1:4000      | 0.1 | 70  | 12  | 98 | 327   | 14           |
| <b>Complex 1</b>                                                                 | TBAB<br>(0.75) | styrene oxide)<br>1:40000        | 1   | 120 | 1   | 71 | 28400 | This<br>work |
| <b>Complex 2</b>                                                                 | TBAB<br>(0.75) | styrene oxide)<br>1:40000        | 1   | 120 | 1   | 60 | 12000 | This<br>work |
| <b>Complex 1</b>                                                                 | TBAB<br>(0.75) | styrene oxide)<br>1:10000        | 1   | 100 | 1   | 72 | 7200  | This<br>work |
| <b>Complex 1</b>                                                                 | TBAB<br>(0.75) | styrene oxide)<br>1:10000        | 1   | 80  | 1   | 42 | 4200  | This<br>work |
| <b>Complex 1</b>                                                                 | TBAB<br>(0.75) | styrene oxide)<br>1:10000        | 1   | 60  | 1   | 19 | 1900  | This<br>work |

#### 4. <sup>1</sup>H NMR spectra of the substrates and products.

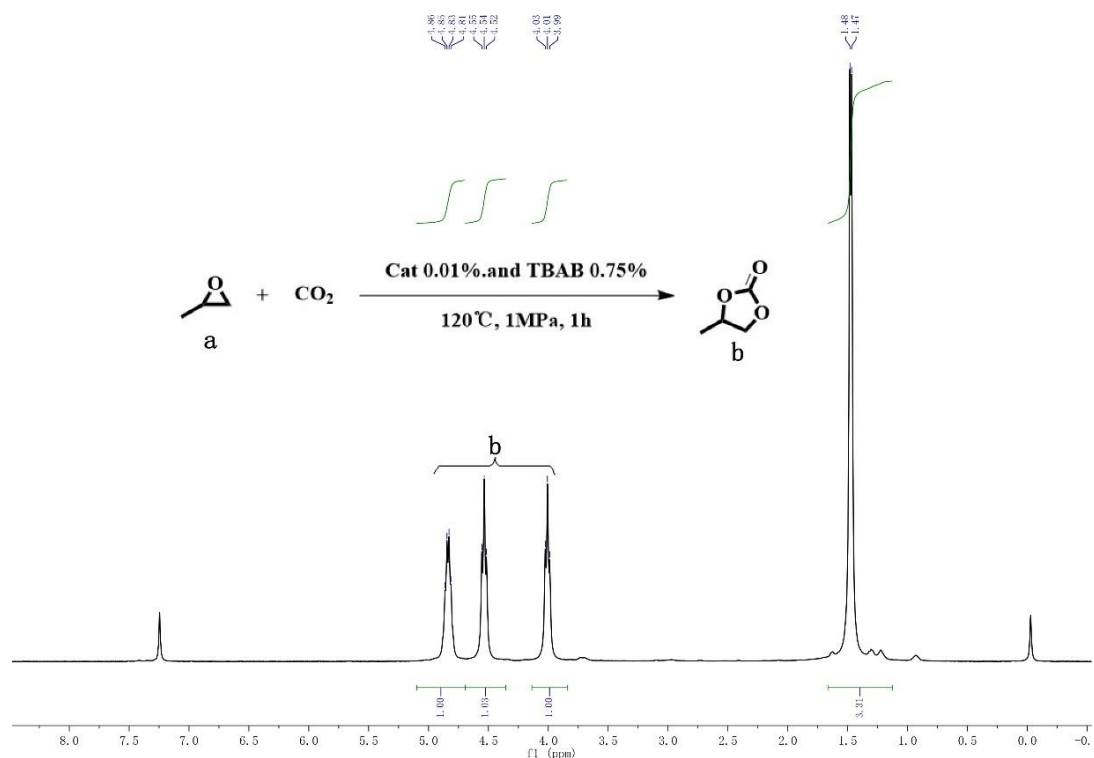

**Fig. S12.** <sup>1</sup>H-NMR (CDCl<sub>3</sub>) spectrum of the reaction substrate of cycloaddition of CO<sub>2</sub> with PO catalyzed by **Complex 1**. <sup>1</sup>H-NMR analysis of the reaction substrates indicates that the PO almost converts to cyclic carbonates catalyzed by **Complex 1** at 120°C for 1h.

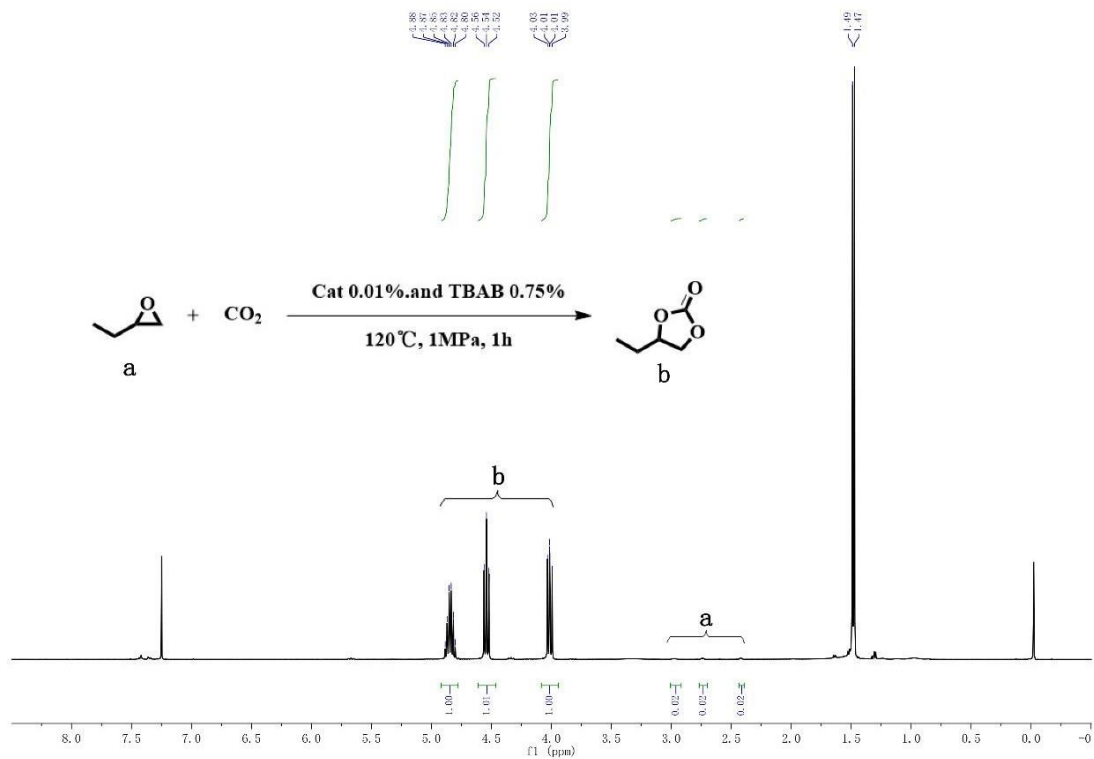

**Fig. S13.** <sup>1</sup>H-NMR (CDCl<sub>3</sub>) spectrum of the reaction substrate of cycloaddition of CO<sub>2</sub> with epoxybutane catalyzed by **Complex 1**. <sup>1</sup>H-NMR analysis of the reaction substrates indicates that the epoxybutane almost converts to cyclic carbonates catalyzed by **Complex 1** at 120°C for 1h.

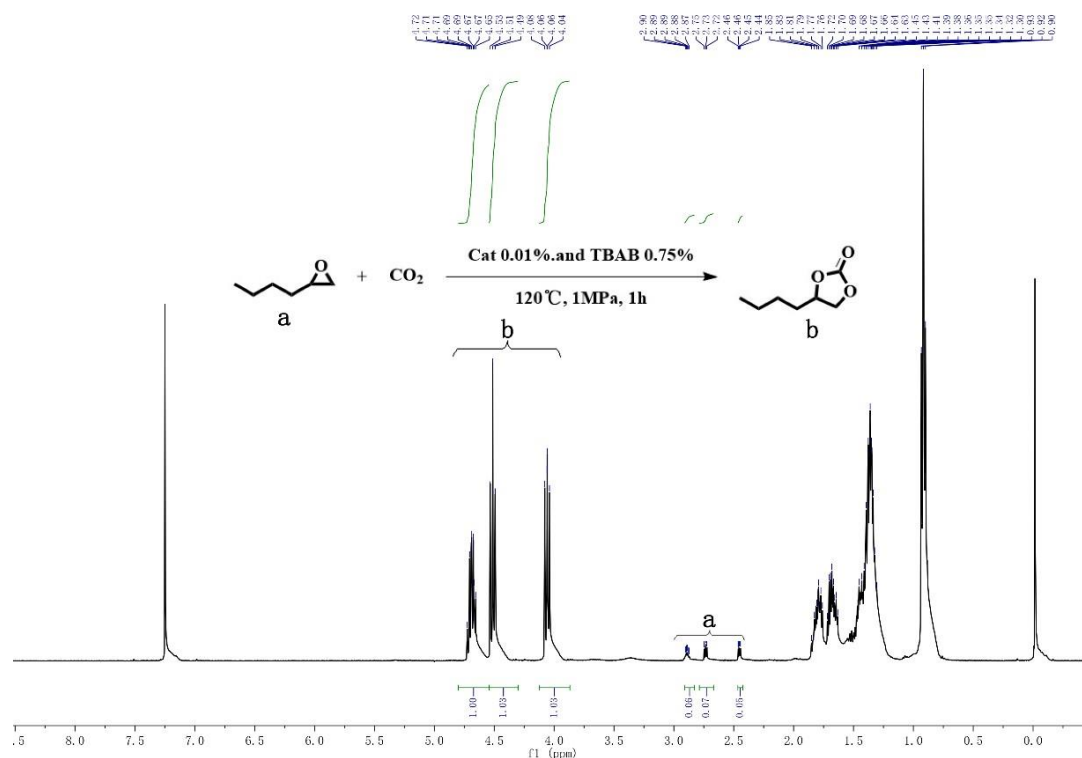

**Fig. S14.** <sup>1</sup>H-NMR (CDCl<sub>3</sub>) spectrum of the reaction substrate of cycloaddition of CO<sub>2</sub> with 1,2-Epoxyhexane catalyzed by **Complex 1**. <sup>1</sup>H-NMR analysis of the reaction substrates indicates that the 1,2-Epoxyhexane converts to cyclic carbonates up to 94% catalyzed by **Complex 1** at 120°C for 1h.

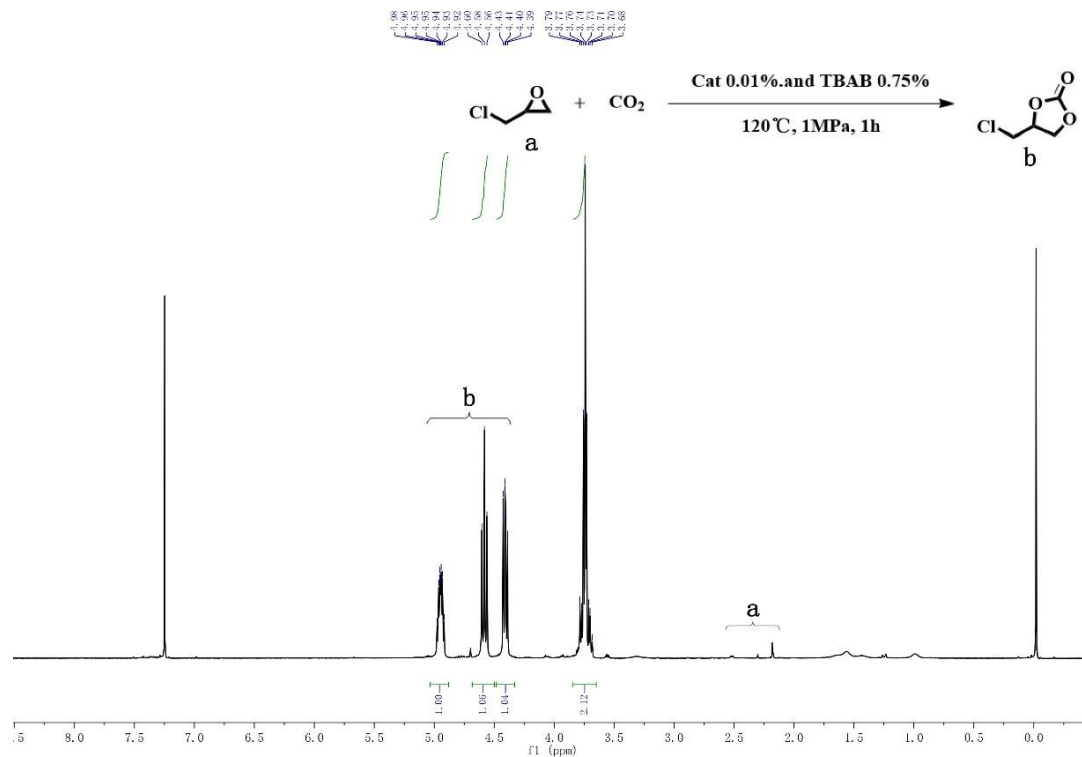

**Fig. S15.** <sup>1</sup>H-NMR (CDCl<sub>3</sub>) spectrum of the reaction substrate of cycloaddition of CO<sub>2</sub> with epichlorohydrin catalyzed by **Complex 1**. <sup>1</sup>H-NMR analysis of the reaction substrates indicates that the converts to cyclic carbonates almost catalyzed by **Complex 1** at 120°C for 1h.

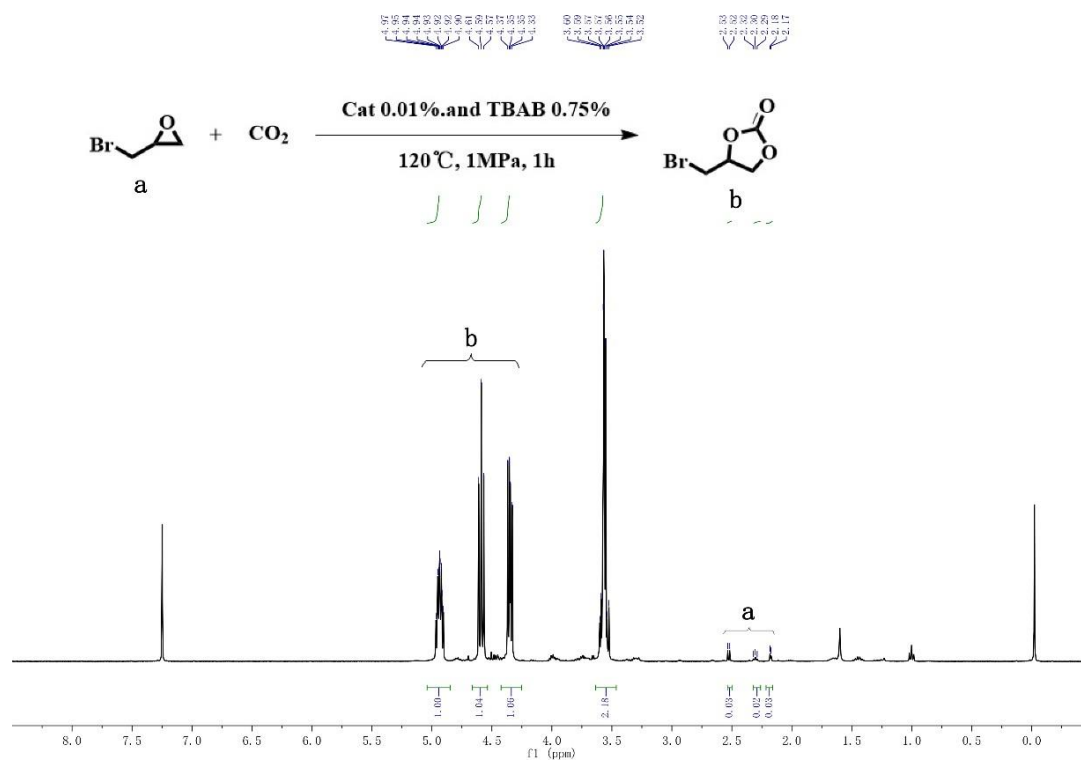

**Fig. S16.** <sup>1</sup>H-NMR (CDCl<sub>3</sub>) spectrum of the reaction substrate of cycloaddition of CO<sub>2</sub> with 1-bromo-2,3-epoxypropane catalyzed by **Complex 1**. <sup>1</sup>H-NMR analysis of the reaction substrates indicates that the 1-bromo-2,3-epoxypropane converts to cyclic carbonates almost catalyzed by **Complex 1** at 120°C for 1h.

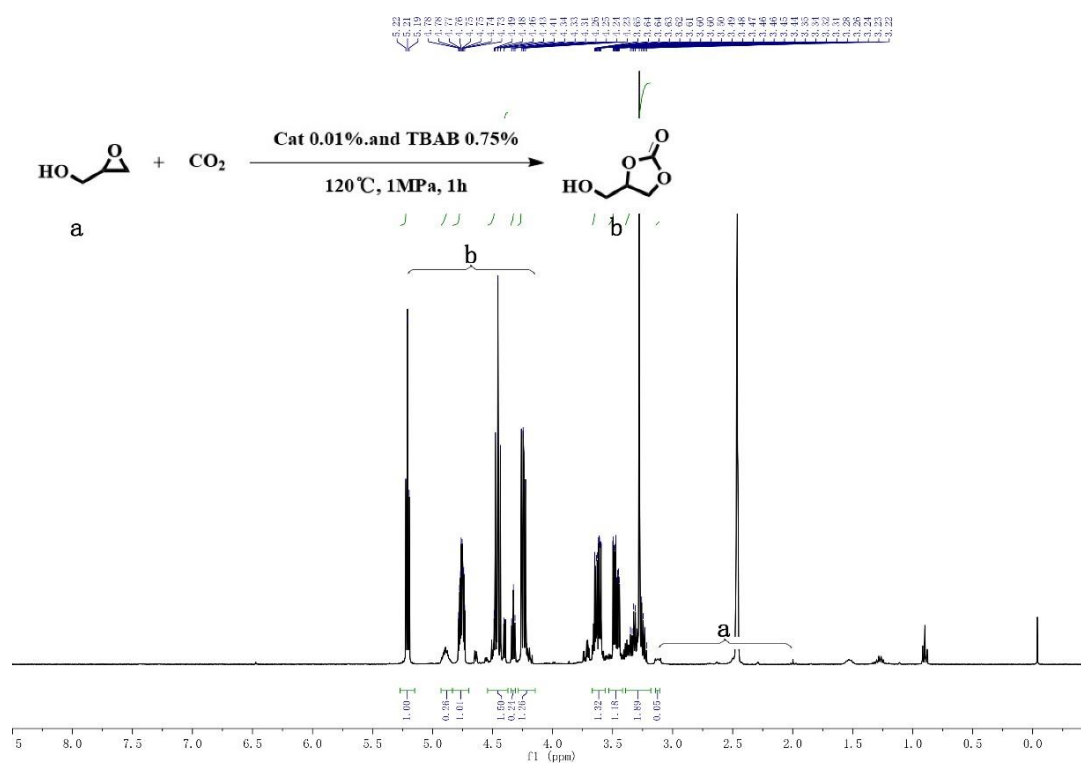

**Fig. S17.** <sup>1</sup>H-NMR (DMSO-d<sub>6</sub>, 25°C) spectrum of the reaction substrate of cycloaddition of CO<sub>2</sub> with glycidol catalyzed by **Complex 1**. <sup>1</sup>H-NMR analysis of the reaction substrates indicates that the glycidol converts to cyclic carbonates almost catalyzed by **Complex 1** at 120°C for 1h.



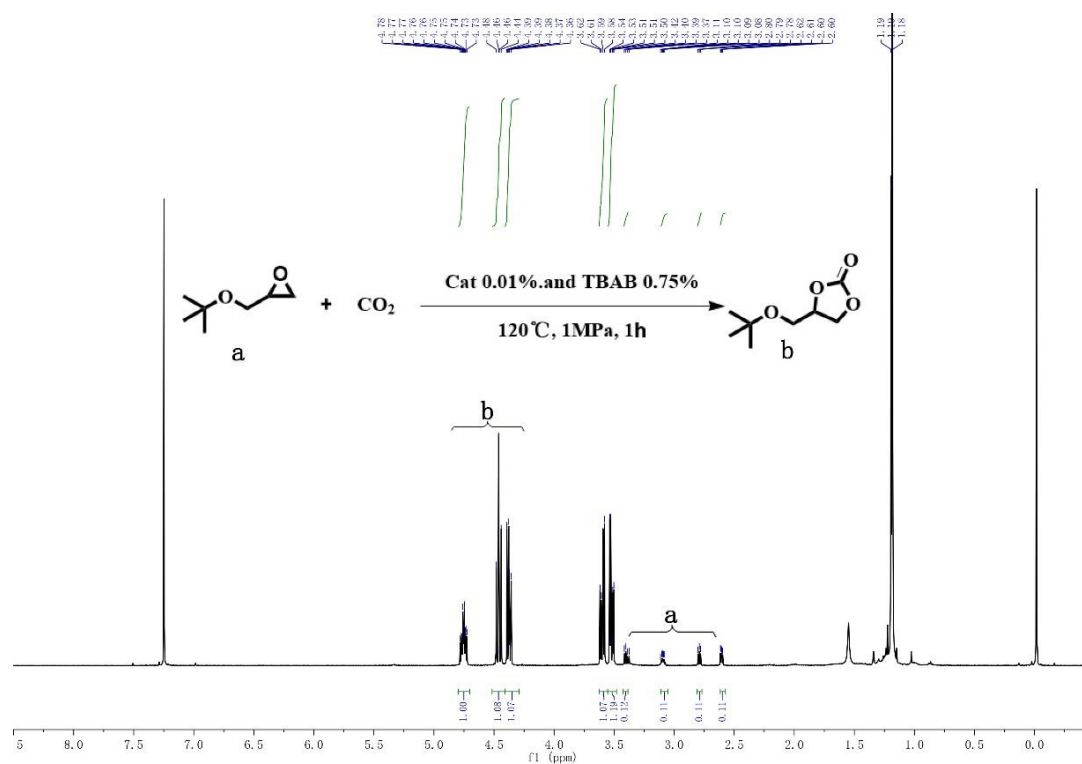

**Fig. S18.**  $^1\text{H-NMR}$  ( $\text{CDCl}_3$ ) spectrum of the reaction substrate of cycloaddition of  $\text{CO}_2$  with t-butyl glycidyl ether catalyzed by **Complex 1**.  $^1\text{H-NMR}$  analysis of the reaction substrates indicates that the t-butyl glycidyl ether converts to cyclic carbonates up to 90% catalyzed by **Complex 1** at  $120^\circ\text{C}$  for 1h.

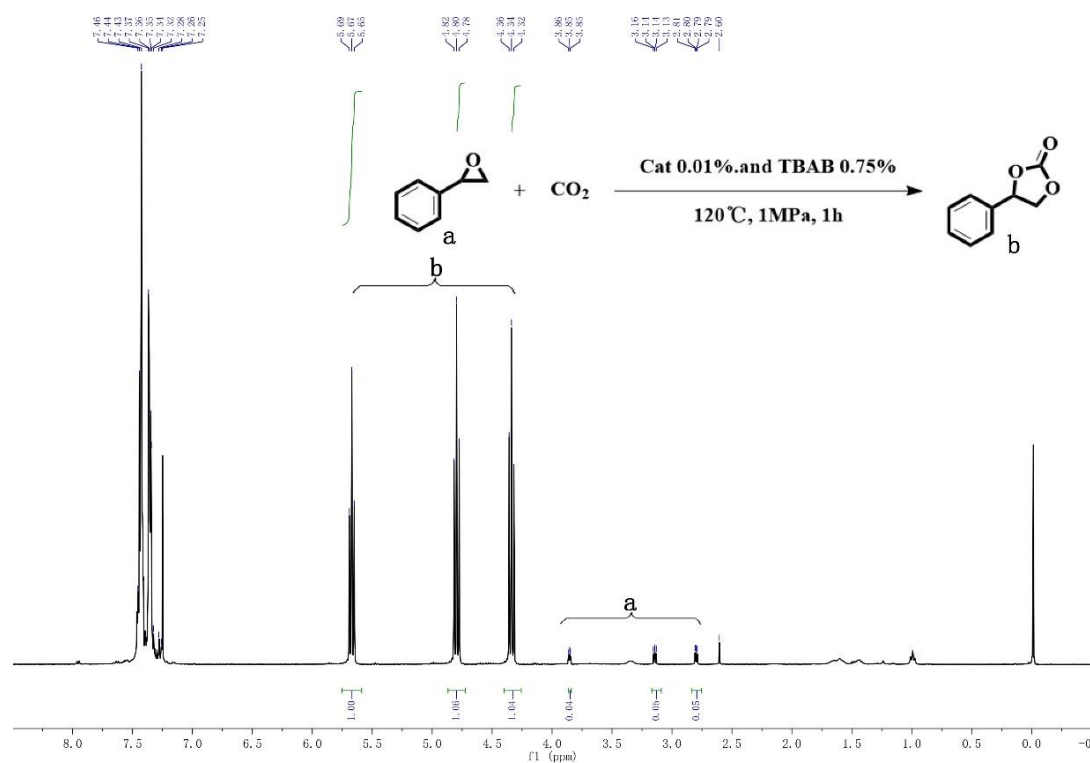

**Fig. S19.**  $^1\text{H-NMR}$  ( $\text{CDCl}_3$ ) spectrum of the reaction substrate of cycloaddition of  $\text{CO}_2$  with styrene oxide catalyzed by **Complex 1**.  $^1\text{H-NMR}$  analysis of the reaction substrates indicates that the styrene oxide to cyclic carbonates up to 95% catalyzed by **Complex 1** at  $120^\circ\text{C}$  for 1h.

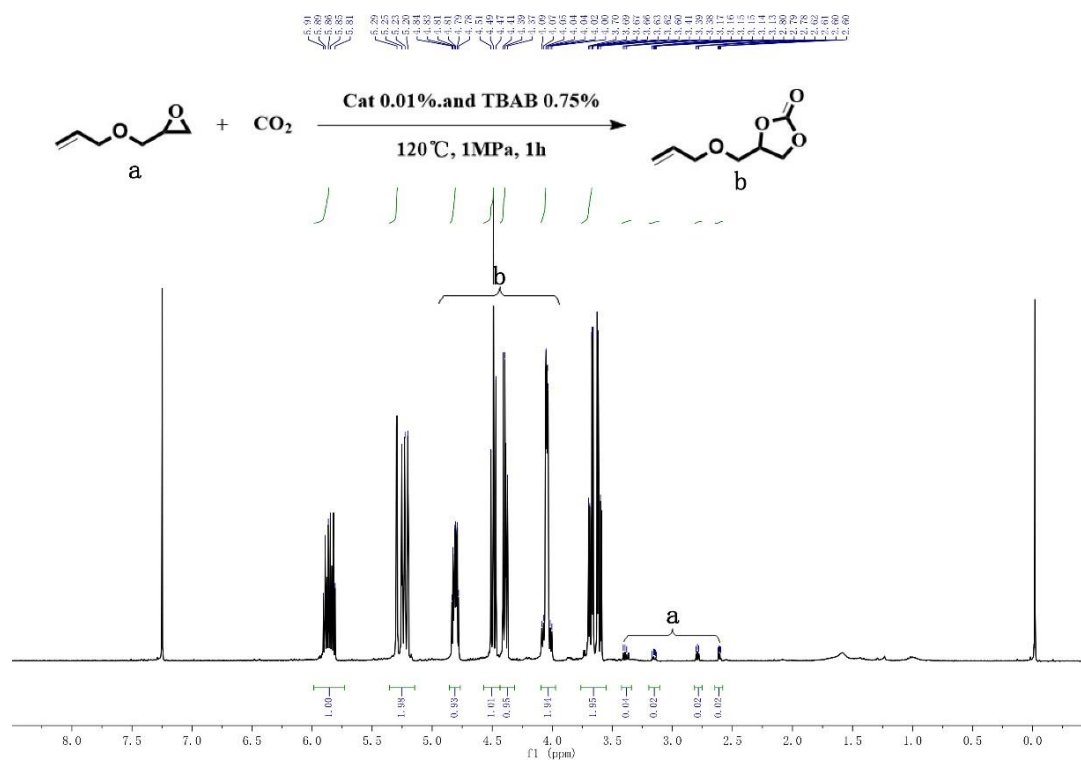

**Fig. S20.** <sup>1</sup>H-NMR (CDCl<sub>3</sub>) spectrum of the reaction substrate of cycloaddition of CO<sub>2</sub> with allyl glycidyl ether catalyzed by **Complex 1**. <sup>1</sup>H-NMR analysis of the reaction substrates indicates that the allyl glycidyl ether to cyclic carbonates almost catalyzed by **Complex 1** at 120°C for 1h.

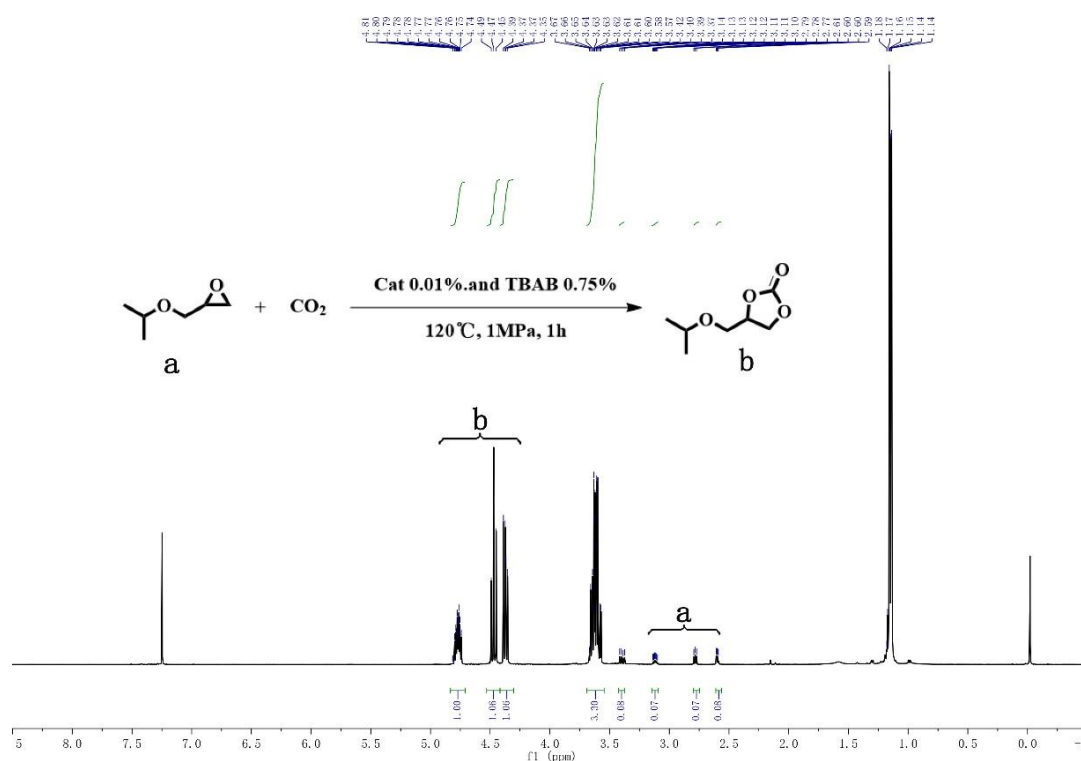

**Fig. S21** <sup>1</sup>H-NMR (CDCl<sub>3</sub>) spectrum of the reaction substrate of cycloaddition of CO<sub>2</sub> with isopropyl glycidyl ether catalyzed by **Complex 1**. <sup>1</sup>H-NMR analysis of the reaction substrates indicates that the isopropyl glycidyl ether to cyclic carbonates up to 95% catalyzed by **Complex 1** at 120°C for 1h.

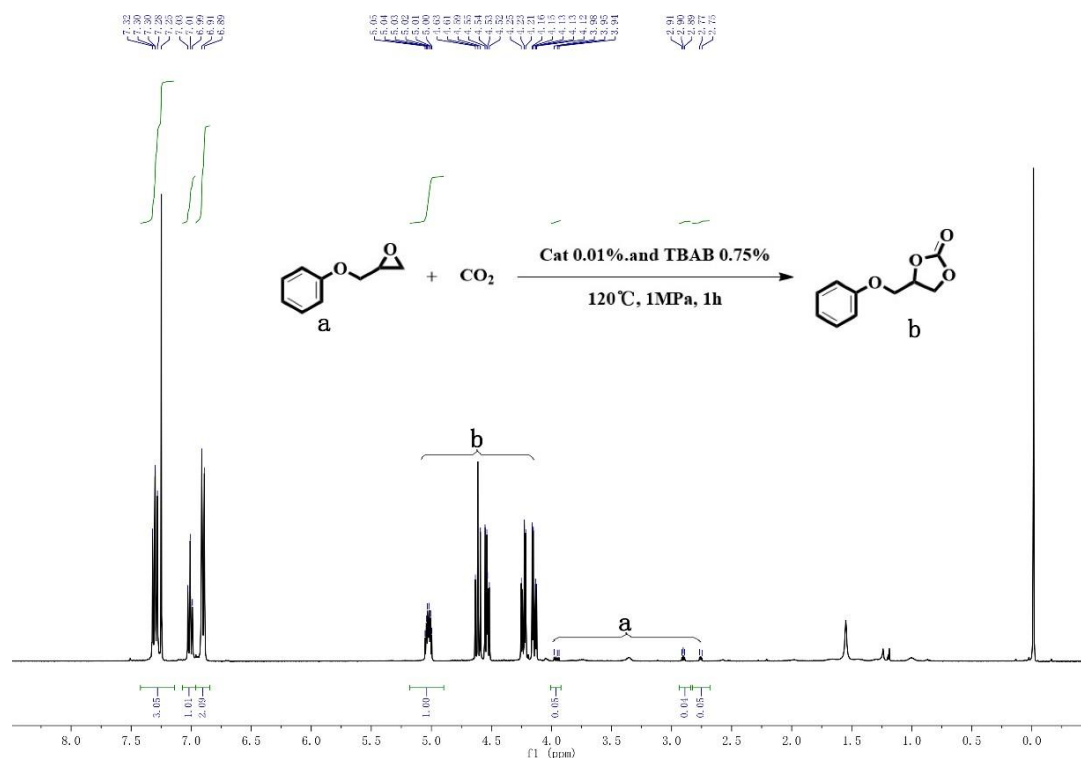

**Fig. S22.** <sup>1</sup>H-NMR (CDCl<sub>3</sub>) spectrum of the reaction substrate of cycloaddition of CO<sub>2</sub> with glycidyl phenyl ether catalyzed by **Complex 1**. <sup>1</sup>H-NMR analysis of the reaction substrates indicates that the glycidyl phenyl ether to cyclic carbonates up to 95% catalyzed by **Complex 1** at 120°C for 1h.

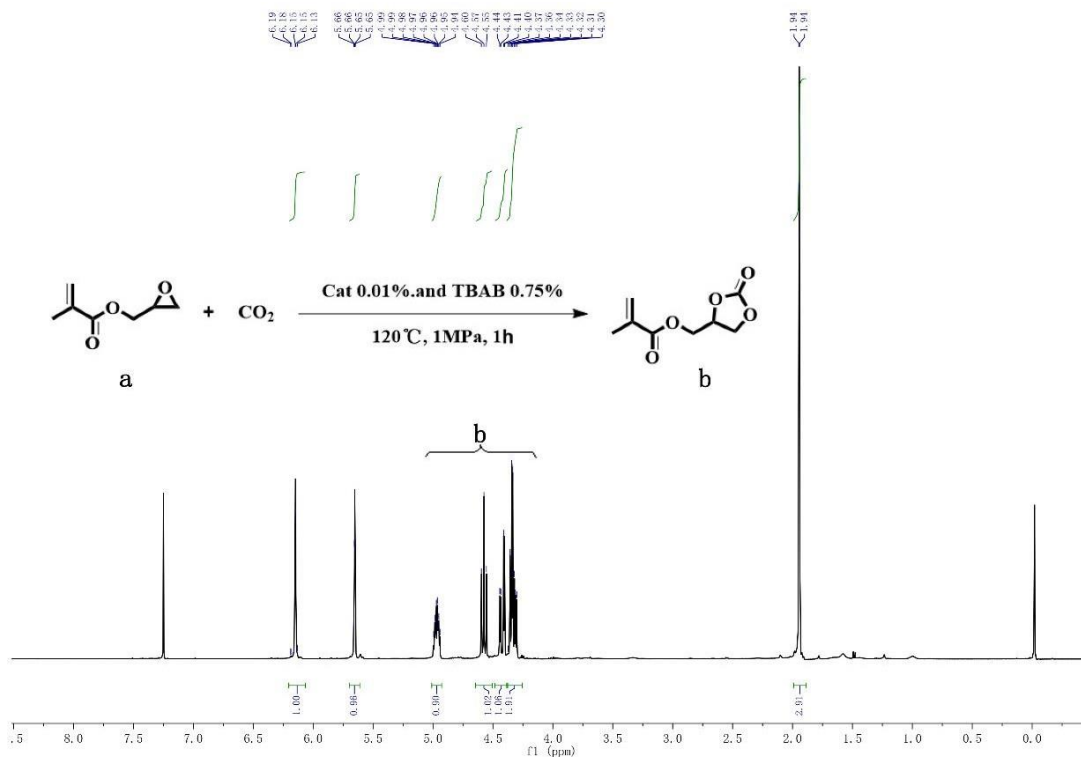

**Fig. S23.** <sup>1</sup>H-NMR (CDCl<sub>3</sub>) spectrum of the reaction substrate of cycloaddition of CO<sub>2</sub> with glycidyl methacrylate catalyzed by **Complex 1**. <sup>1</sup>H-NMR analysis of the reaction substrates indicates that the glycidyl methacrylate to cyclic carbonates almost catalyzed by **Complex 1** at 120°C for 1h.

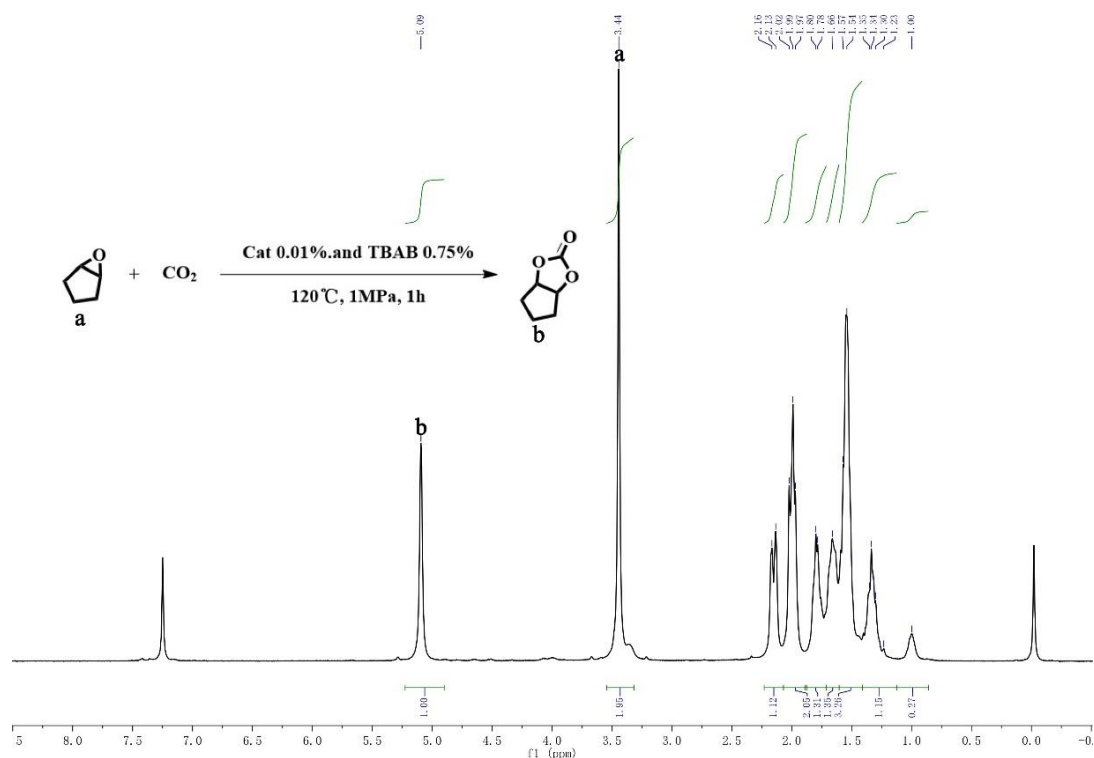

**Fig. S24.** <sup>1</sup>H-NMR (CDCl<sub>3</sub>) spectrum of the reaction substrate of cycloaddition of CO<sub>2</sub> with cyclopentene oxide catalyzed by **Complex 1**. <sup>1</sup>H-NMR analysis of the reaction substrates indicates that the cyclopentene oxide to cyclic carbonates up to 35% catalyzed by **Complex 1** at 120°C for 1h.

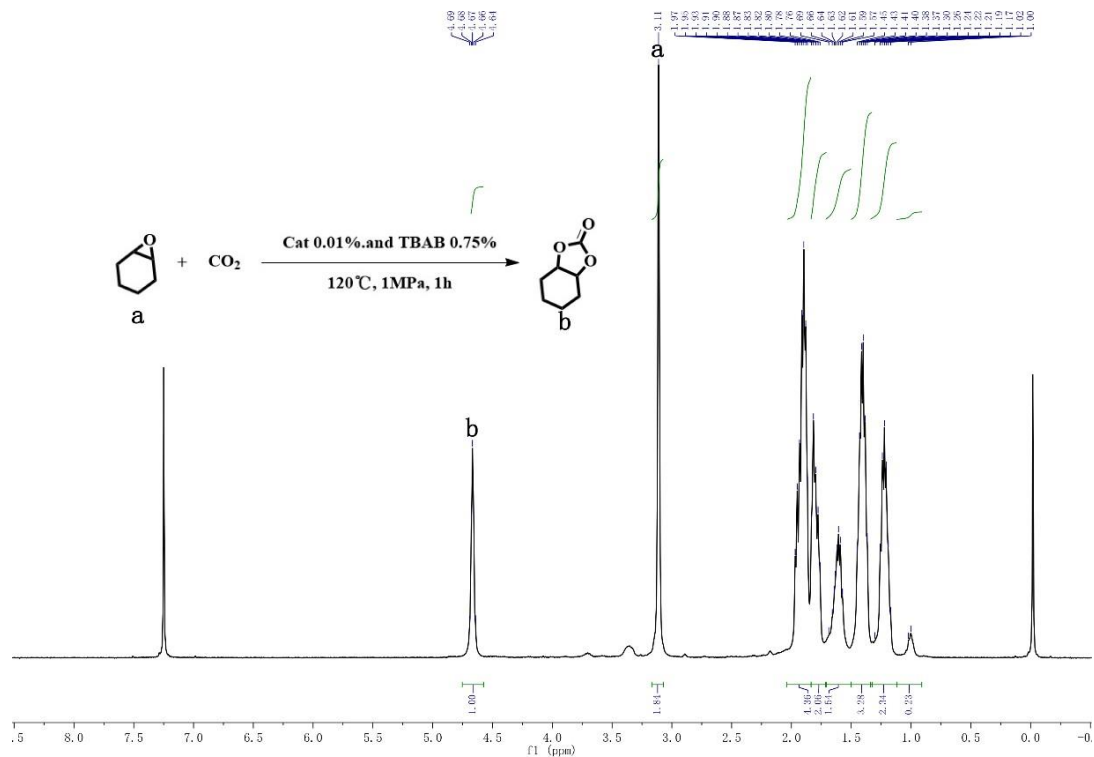

**Fig. S25.** <sup>1</sup>H-NMR (CDCl<sub>3</sub>) spectrum of the reaction substrate of cycloaddition of CO<sub>2</sub> with cyclohexene oxide catalyzed by **Complex 1**. <sup>1</sup>H-NMR analysis of the reaction substrates indicates that the cyclohexene oxide to cyclic carbonates up to 35% catalyzed by **Complex 1** at 120°C for 1h.

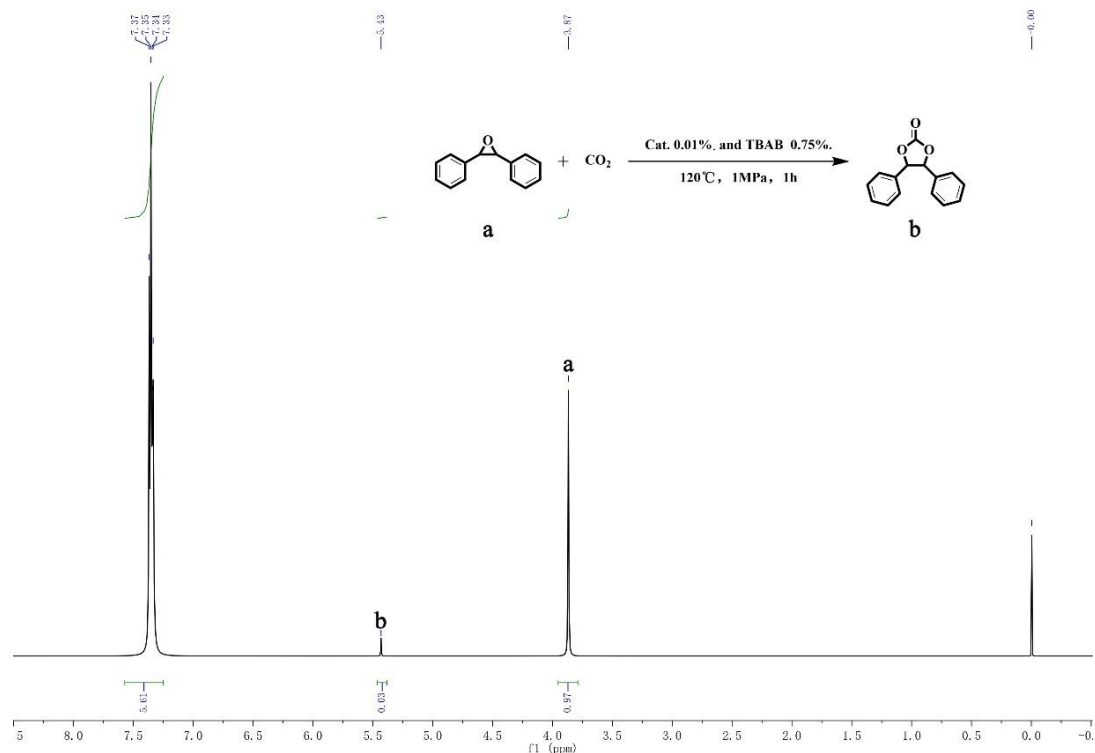

**Fig. S26.**  $^1\text{H-NMR}$  ( $\text{CDCl}_3$ ) spectrum of the reaction substrate of cycloaddition of  $\text{CO}_2$  with stilbene oxide catalyzed by **Complex 1**.  $^1\text{H-NMR}$  analysis of the reaction substrates indicates that the stilbene oxide to cyclic carbonates up to 3% catalyzed by **Complex 1** at  $120^\circ\text{C}$  for 1h.

## 5. References

1. K. Cheng, Q. Z. Zheng, Y. Qian, L. Shi, J. Zhao and H. L. Zhu, *Bioorg Med Chem*, 2009, **17**, 7861-7871.
2. J. K. Lee, Y. J. Kim, Y.-S. Choi, H. Lee, J. S. Lee, J. Hong, E.-K. Jeong, H. S. Kim and M. Cheong, *Applied Catalysis B: Environmental*, 2012, **111-112**, 621-627.
3. R. M. Haak, A. Decortes, E. C. Escudero-Adan, M. Martinez Belmonte, E. Martin, J. Benet-Buchholz and A. W. Kleij, *Inorg Chem*, 2011, **50**, 7934-7936.
4. R. Ma, L.-N. He and Y.-B. Zhou, *Green Chemistry*, 2016, **18**, 226-231.
5. F. Li, C. Xia, L. Xu, W. Sun and G. Chen, *Chemical Communications*, 2003, **0**, 2042-2043.
6. H. Xie, S. Li and S. Zhang, *Journal of Molecular Catalysis A: Chemical*, 2006, **250**, 30-34.
7. Y. Xie, T. T. Wang, R. X. Yang, N. Y. Huang, K. Zou and W. Q. Deng, *ChemSusChem*, 2014, **7**, 2110-2114.
8. T. Ema, Y. Miyazaki, J. Shimonishi, C. Maeda and J. Y. Hasegawa, *J Am Chem Soc*, 2014, **136**, 15270-15279.
9. N. Wei, Y. Zhang, L. Liu, Z.-B. Han and D.-Q. Yuan, *Applied Catalysis B: Environmental*, 2017, **219**, 603-610.
10. Z. Zhao, J. Qin, C. Zhang, Y. Wang, D. Yuan and Y. Yao, *Inorg Chem*, 2017, **56**, 4569-4576.

11. C. J. Whiteoak, N. Kielland, V. Laserna, E. C. Escudero-Adan, E. Martin and A. W. Kleij, *J Am Chem Soc*, 2013, **135**, 1228-1231.
12. Q. Han, L. Wang, Z. Shi, C. Xu, Z. Dong, Z. Mou and W. Liu, *Chem Asian J*, 2017, **12**, 1364-1373.
13. L. Wang, C. Xu, Q.-X. Han, X.-L. Tang, P. Zhou, R. Zhang, G. Gao, B. Xu, W. Qin and W.-S. Liu, *Chemical Communications*, 2018, **54**, 2212-2215.
14. C. Xu, Y. Liu, L. Wang, J. Ma, L. Yang, F. X. Pan, A. M. Kirillov and W. Liu, *Dalton Trans*, 2017, **46**, 16426-16431.
